# Supplementary material for: Antifungal Activity of Linear and Disulfide-Cyclized Ultrashort Cationic Lipopeptides Alone and in Combination with Fluconazole against Vulvovaginal Candida spp
Source: Pharmaceutics. 2021 Sep 30;13(10):1589. doi: 10.3390/pharmaceutics13101589 (PMC8537571; doi:10.3390/pharmaceutics13101589)
Supplement: Supplementary file 1 [file pharmaceutics-13-01589-s001.zip › pharmaceutics-1365878-supplementary.pdf]

# Supplementary Materials: Antifungal Activity of Linear and Disulfide-Cyclized Ultrashort Cationic Lipopeptides Alone and in Combination with Fluconazole Against Vulvovaginal *Candida* spp.

Paulina Czechowicz, Damian Neubauer, Joanna Nowicka, Wojciech Kamysz, Grażyna Gościński

**Table S1.** Concentrations of fluconazole-C1 combination exhibited a synergistic effect against 15 isolates of *Candida* strains.

| MIC of C1<br>[μg/mL] | FIC           |                                                      | No. of Strains Against Which<br>This Combination was<br>Effective |
|----------------------|---------------|------------------------------------------------------|-------------------------------------------------------------------|
|                      | C1<br>[μg/mL] | Fluconazole<br>[μg/mL]<br>(random order)             |                                                                   |
| 4                    | 1             | 0.03125 or 1                                         | 1 × <i>C. albicans</i><br>1 × <i>C. lusitaniae</i>                |
| 8                    | 1             | 0.001953                                             | 2 × <i>C. albicans</i>                                            |
| 8                    | 2             | 0.001953 or<br>0.003906 or<br>0.015625 or<br>0.03125 | 10 × <i>C. albicans</i>                                           |
| 32                   | 4             | 0.001953                                             | 1 × <i>C. albicans</i>                                            |
